# Supplementary material
Source: publisher figshare collection journal article supplement (https://acs.figshare.com/ndownloader/files/4287553)
Supplement: Supplementary file 1 [file 4287553]

# New Candidaspongiolides, Tedanolide Analogs that Selectively Inhibit Melanoma Cell Growth

Emily L. Whitson, Kristen M. Pluchino, Matthew D. Hall, James B. McMahon, Tawnya C. McKee

## Supporting Information

|              |                                                                                                                                                                                     |
|--------------|-------------------------------------------------------------------------------------------------------------------------------------------------------------------------------------|
| <b>S3-S7</b> | General Experimental Procedures, Biological Material, Extraction and Isolation, Compound Properties <b>1-8</b> , Acetylation and Reduction Reaction Conditions, Bioassay Conditions |
| <b>S8</b>    | Table S1. NMR Data for Candidaspongiolide A ( <b>3</b> ) in Acetone- <i>d</i> <sub>6</sub>                                                                                          |
| <b>S9</b>    | Table S2. NMR Data for Tedanolide ( <b>5</b> ) in CDCl <sub>3</sub>                                                                                                                 |
| <b>S10</b>   | Table S3. NMR Data for Tedanolide ( <b>5</b> ) in CD <sub>3</sub> OD                                                                                                                |
| <b>S11</b>   | Table S4. NMR Data for 28-acetyl-precandidaspongiolide A ( <b>6</b> ) in CD <sub>3</sub> OD                                                                                         |
| <b>S12</b>   | Table S5. NMR Data for 11 <i>R</i> -dihydro precandidaspongiolide A ( <b>7</b> ) in CD <sub>3</sub> OD                                                                              |
| <b>S13</b>   | Table S6. NMR Data for 11 <i>S</i> -dihydro precandidaspongiolide A ( <b>8</b> ) in CD <sub>3</sub> OD                                                                              |
| <b>S14</b>   | Figure S1. NCI 60-cell line screen, single dose (10 <sup>-5</sup> M) of <b>1/2</b>                                                                                                  |
| <b>S15</b>   | Figure S2. NCI 60-cell line screen, single dose (10 <sup>-5</sup> M) of <b>1/2</b>                                                                                                  |
| <b>S16</b>   | Figure S3. NCI 60-cell line screen, dose response curves for <b>1/2</b>                                                                                                             |
| <b>S17</b>   | Figure S4. NCI 60-cell line screen, mean bar graphs for <b>1/2</b>                                                                                                                  |
| <b>S18</b>   | Figure S5. NCI 60-cell line screen, dose response curves for candidaspongiolide acyl ester mixture                                                                                  |
| <b>S19</b>   | Figure S6. NCI 60-cell line screen, mean bar graphs for candidaspongiolide acyl ester mixture                                                                                       |
| <b>S20</b>   | Figure S7. NCI 60-cell line screen, dose response curves for candidaspongiolide A (macrolide core)                                                                                  |
| <b>S21</b>   | Figure S8. NCI 60-cell line screen, mean bar graphs for candidaspongiolide A (macrolide core)                                                                                       |
| <b>S22</b>   | Table S7. Melanoma GI <sub>50</sub> 's for candidaspongiolide acyl ester mixture<br>Table S8. Melanoma GI <sub>50</sub> 's for candidaspongiolide A (macrolide core)                |
| <b>S23</b>   | Figure S9. Melanoma IC <sub>50</sub> curves for <b>1/2, 3/4, 5-8</b>                                                                                                                |
| <b>S24</b>   | Figure S10. Breast and Lung IC <sub>50</sub> curves for <b>1/2, 3/4, 5-8</b>                                                                                                        |
| <b>S25</b>   | Figure S11. Precandidaspongiolides A/B ( <b>1/2</b> ) are P-gp substrates                                                                                                           |
| <b>S26</b>   | <sup>1</sup> H NMR Spectrum of Precandidaspongiolides A/B ( <b>1/2</b> ) in CD <sub>3</sub> OD                                                                                      |
| <b>S27</b>   | <sup>13</sup> C NMR Spectrum of Precandidaspongiolides A/B ( <b>1/2</b> ) in CD <sub>3</sub> OD                                                                                     |

|            |                                                                                                                 |
|------------|-----------------------------------------------------------------------------------------------------------------|
| <b>S28</b> | <sup>1</sup> H NMR Spectrum of Candidaspongiolides A/B ( <b>3/4</b> ) in CD <sub>3</sub> OD                     |
| <b>S29</b> | <sup>13</sup> C NMR Spectrum of Candidaspongiolides A/B ( <b>3/4</b> ) in CD <sub>3</sub> OD                    |
| <b>S30</b> | <sup>1</sup> H NMR Spectrum of Candidaspongiolides A/B ( <b>3/4</b> ) in acetone- <i>d</i> <sub>6</sub>         |
| <b>S31</b> | HSQC Spectrum of Candidaspongiolides A/B ( <b>3/4</b> ) in acetone- <i>d</i> <sub>6</sub>                       |
| <b>S32</b> | <sup>1</sup> H NMR Spectrum of Tedanolide ( <b>5</b> ) in CDCl <sub>3</sub>                                     |
| <b>S33</b> | HSQC Spectrum of Tedanolide ( <b>5</b> ) in CDCl <sub>3</sub>                                                   |
| <b>S34</b> | <sup>1</sup> H NMR Spectrum of Tedanolide ( <b>5</b> ) in CD <sub>3</sub> OD                                    |
| <b>S35</b> | HSQC Spectrum of Tedanolide ( <b>5</b> ) in CD <sub>3</sub> OD                                                  |
| <b>S36</b> | <sup>1</sup> H NMR Spectrum of 28-Acetyl-precandidaspongiolide A ( <b>6</b> ) in CD <sub>3</sub> OD             |
| <b>S37</b> | <sup>13</sup> C NMR Spectrum of 28-Acetyl-precandidaspongiolide A ( <b>6</b> ) in CD <sub>3</sub> OD            |
| <b>S38</b> | <sup>1</sup> H NMR Spectrum of 11 <i>R</i> -dihydro-precandidaspongiolide A ( <b>7</b> ) in CD <sub>3</sub> OD  |
| <b>S39</b> | <sup>13</sup> C NMR Spectrum of 11 <i>R</i> -dihydro-precandidaspongiolide A ( <b>7</b> ) in CD <sub>3</sub> OD |
| <b>S40</b> | ROESY Spectrum of 11 <i>R</i> -dihydro-precandidaspongiolide A ( <b>7</b> ) in CD <sub>3</sub> OD               |
| <b>S41</b> | <sup>1</sup> H NMR Spectrum of 11 <i>S</i> -dihydro-precandidaspongiolide A ( <b>8</b> ) in CD <sub>3</sub> OD  |
| <b>S42</b> | <sup>13</sup> C NMR Spectrum of 11 <i>S</i> -dihydro-precandidaspongiolide A ( <b>8</b> ) in CD <sub>3</sub> OD |
| <b>S43</b> | ROESY Spectrum of 11 <i>S</i> -dihydro-precandidaspongiolide A ( <b>8</b> ) in CD <sub>3</sub> OD               |

**General Experimental Procedures.** Optical rotations were measured on a Perkin-Elmer 241 polarimeter. UV spectra were acquired in spectroscopy grade MeOH using a Varian Cary 50 UV-Vis spectrophotometer. NMR data were collected using an Avance III 600 ( $^1\text{H}$  600 MHz,  $^{13}\text{C}$  150 MHz) NMR spectrometer (Bruker Biospin) with a 3-mm PATXI probe, referenced to residual solvent. MS spectra were measured with an Agilent Technologies 6510 Q-TOF LC-MS and an Applied Biosystems, Inc. QSTAR XL hybrid triple-quad time-of-flight (QqTOF) mass spectrometer. Initial fractionation was performed on Diol SPE cartridges (Applied Separations) and Sephadex LH-20 resin (Amersham Biosciences). HPLC purification was performed on a Rainin SD-1/UV-1 system.

**Biological Material.** Two different collections from Papua New Guinea (OCDN1808 and OCDN5955), used in this investigation, were initially identified as *Euryspongia* sp. They were subsequently compared to Great Barrier Reef specimens of *C. flabellata* (the original source of the candidaspongiolides) and reclassified as *Candidaspongia* sp.<sup>1</sup> The Papua New Guinea specimens are a darker color and have somewhat sharper conules, while the *C. flabellata* specimens from Australia had thicker fibers and a thicker sand coat on the surface. Vouchers for the Papua New Guinea collections are maintained at the Smithsonian Sorting Center, Suitland, Maryland.

**Extraction and Isolation.** The Papua New Guinea *Candidaspongia* sp. specimens were repeatedly extracted according to the methodology outlined in McCloud<sup>2</sup> to give the aqueous crude extracts. A portion of this extract (520 mg) was subjected to size-exclusion chromatography on Sephadex LH-20 (2.5 × 90 cm) using hexanes/CH<sub>2</sub>Cl<sub>2</sub>/MeOH (2:5:1) to yield seven fractions (141A-141G). Fraction 141F was chromatographed on C<sub>18</sub> (2.0 × 17 cm)

---

<sup>1</sup> Meragelman, T. L.; Willis, R. H.; Woldemichael, G. M.; Heaton, A.; Murphy, P. T.; Snader, K. M.; Newman, D. J.; van Soest, R.; Boyd, M. R.; Cardellina II, J. H.; McKee, T. C. *J. Nat. Prod.* **2007**, *70*, 1133.

<sup>2</sup> McCloud, T. G. *Molecules*, **2010**, *15*, 4526.

using 50/50 50% CH<sub>3</sub>CN/50% H<sub>2</sub>O (+0.1% AcOH) to yield precandidaspongiolides A/B (**1/2**, 11.2 mg). Fraction 141C was chromatographed on C<sub>18</sub> (2.0 × 17 cm) using 55% CH<sub>3</sub>CN/45% H<sub>2</sub>O (+0.1% AcOH) to yield seven fractions (154A-154G). Fraction 154F was purified by HPLC using a Rainin Dynamax C<sub>18</sub> column (250 × 10 mm) employing a gradient of 35% CH<sub>3</sub>CN/65% H<sub>2</sub>O (+0.1% AcOH) to 85% CH<sub>3</sub>CN at 4.5 mL/min over 20 min to yield candidaspongiolides A/B (**3/4**, 0.9 mg). Fraction 141D was purified by HPLC utilizing the same method to yield tedanolide (**5**, 0.4 mg).

**Precandiaspongiolides A and B (1/2):**  $[\alpha]_D^{25} + 58.3$  (*c* 0.23, MeOH); UV (MeOH)  $\lambda_{\max}$  (log  $\epsilon$ ) 205 (3.69) nm; <sup>1</sup>H NMR and <sup>13</sup>C NMR data, see Table 1; HRESIMS *m/z* 665.3146 [M+Na]<sup>+</sup> (calcd for C<sub>32</sub>H<sub>50</sub>O<sub>13</sub>Na, 665.3144).

**Candidaspongiolides A and B (3/4):**  $[\alpha]_D^{25} + 20.0$  (*c* 0.11, MeOH); UV (MeOH)  $\lambda_{\max}$  (log  $\epsilon$ ) 204 (3.48) nm; <sup>1</sup>H NMR and <sup>13</sup>C NMR data, see Table 1; HRESIMS *m/z* 707.3235 [M+Na]<sup>+</sup> (calcd for C<sub>34</sub>H<sub>52</sub>O<sub>14</sub>Na, 707.3249).

**(+)-Tedanolide (5):**  $[\alpha]_D^{25} + 20$  (*c* 0.02, MeOH); UV (MeOH)  $\lambda_{\max}$  (log  $\epsilon$ ) 204 (3.79) nm; <sup>1</sup>H NMR and <sup>13</sup>C NMR data in CDCl<sub>3</sub> and CD<sub>3</sub>OD, see Tables S2 and S3; HRESIMS *m/z* 633.3232 [M+Na]<sup>+</sup> (calcd for C<sub>32</sub>H<sub>50</sub>O<sub>11</sub>Na, 633.3245).

**Acetylation of Precandidaspongiolides A and B (1/2).** A stock solution of AcCl was prepared on ice by dissolving 1  $\mu$ L of AcCl in 50  $\mu$ L of anhydrous CH<sub>2</sub>Cl<sub>2</sub>. 7  $\mu$ L of the AcCl solution (2  $\mu$ mol) was added to a stirring solution of **1/2** (1.1 mg, 1.7  $\mu$ mol) in 2,4,6-trimethylpyridine (excess) at -40 °C.<sup>3</sup> The reaction was monitored by LC-MS for the production of mono-acetylated product and allowed to stir at -40 °C for 3h and then 25°C for 19h. After the mono-acetylated product formation was observed, the reaction mixture was diluted with H<sub>2</sub>O and

<sup>3</sup> Ishihara, K.; Kurihara, H.; Yamamoto, H. *J. Org. Chem.* 1993, 58, 3791.

dried under N<sub>2</sub>. The reaction mixture was then purified by HPLC using a Rainin Dynamax C<sub>18</sub> column (250 × 10 mm) employing a gradient of 35% CH<sub>3</sub>CN/65% H<sub>2</sub>O (+0.1% AcOH) to 85% CH<sub>3</sub>CN at 4.5 mL/min over 20 min to yield 28-acetyl-precandidaspongiolide A (**6**, 0.48 mg, 41% yield) and unreacted precandidaspongiolides A/B (**1/2**, 0.57 mg, 52% yield).

**28-acetyl-precandidaspongiolide A (6):**  $[\alpha]_D^{25} + 28.6$  (*c* 0.12, MeOH); UV (MeOH)  $\lambda_{\max}$  (log  $\epsilon$ ) 204 (3.38) nm; <sup>1</sup>H NMR and <sup>13</sup>C NMR data, see Table S4; HRESIMS *m/z* 707.3245 [M+Na]<sup>+</sup> (calcd for C<sub>34</sub>H<sub>52</sub>O<sub>14</sub>Na, 707.3249).

**Reduction of Precandidaspongiolides A and B (1/2).** NaBH<sub>4</sub> (~3 mg, excess) was added to a semi-pure (~75%) solution of **1/2** (13.0 mg, 20.2  $\mu$ mol) in MeOH (200  $\mu$ L). The reaction was allowed to stir at rt for 10 min. The reaction mixture was diluted with H<sub>2</sub>O and desalted by passing through a C<sub>18</sub> SPE column. The products were then purified by HPLC using a Rainin Dynamax C<sub>18</sub> column (250 × 10 mm) employing a gradient of 25% CH<sub>3</sub>CN/75% H<sub>2</sub>O (+0.1% AcOH) to 75% CH<sub>3</sub>CN at 4.5 mL/min over 20 min to yield 11*R*-dihydro-precandidaspongiolide A (**7**, 4.76 mg, 37% yield) and 11*S*-dihydro-precandidaspongiolide A (**8**, 0.49 mg, 4% yield).

**11*R*-dihydro precandidaspongiolide A (7):**  $[\alpha]_D^{25} + 49.7$  (*c* 0.18, MeOH); UV (MeOH)  $\lambda_{\max}$  (log  $\epsilon$ ) 204 (3.60) nm; <sup>1</sup>H NMR and <sup>13</sup>C NMR data, see Table S5; HRESIMS *m/z* 667.3304 [M+Na]<sup>+</sup> (calcd for C<sub>32</sub>H<sub>52</sub>O<sub>13</sub>Na, 667.3300).

**11*S*-dihydroprecandidaspongiolide A (8):**  $[\alpha]_D^{25} + 43.5$  (*c* 0.02, MeOH); UV (MeOH)  $\lambda_{\max}$  (log  $\epsilon$ ) 204 (3.41) nm; <sup>1</sup>H NMR and <sup>13</sup>C NMR data, see Table S6; HRESIMS *m/z* 667.3290 [M+Na]<sup>+</sup> (calcd for C<sub>32</sub>H<sub>52</sub>O<sub>13</sub>Na, 667.3300).

**MTT Cytotoxicity Assay.** Cell survival was measured by the MTT (3-(4,5-dimethylthiazol-2-yl)-2,5-diphenyltetrazolium bromide) cytotoxicity assay (Sigma, St Louis, MO).<sup>4</sup> Cells were seeded in 100  $\mu$ L of medium at a density of  $4 \times 10^3$  cells/well and allowed to incubate at 37°C in 5% CO<sub>2</sub> for 24 hours. Serially diluted drugs were then added in an additional 100  $\mu$ L of medium and incubated for 72 hours. After removal of medium containing drug, MTT (0.5mg/mL) in IMDM growth medium was added to each well and incubated for four hours. The media solution was then removed from the wells, and 100  $\mu$ L acidified 80% ethanol solution was added to lyse cells and dissolve the formazan product. Cell viability was measured spectrophotometrically at 570 nm and background corrected at 690 nm. All MTT assays were performed three times in triplicate. Cytotoxicity (IC<sub>50</sub>) was defined as the drug concentration that reduced cell viability to 50% of the untreated control. Both KB-3-1 and KB-V1 were also coincubated with 1/2 and 100 nM tariquidar (Dr. Susan Bates, NCI).

**Cell lines.** The cell lines used were: the human epithelial adenocarcinoma cell line KB-3-1 and its P-gp-expressing multidrug resistant sub-line KB-V1; the human breast cancer cell line MCF-7; the human lung carcinoma cell line H460; and the human melanoma cell lines M14, LOX IMVI, and UACC-257. All cell lines were grown at 37°C in 5% CO<sub>2</sub> and cultured as follows. The KB, MCF7, M14, and UACC-257 cell lines were cultured in Dulbecco's Modified Eagle's Medium (DMEM,) supplemented with 10% fetal bovine serum, 5 mM L-glutamine, 50 units/mL penicillin, and 50  $\mu$ g/mL streptomycin, all obtained from Life Technologies (Carlsbad, California, USA). LOX IMVI cells were cultured in Roswell Park Memorial Institute (RPMI) 1640 medium from Life Technologies (Carlsbad, California, USA) and supplemented as

---

<sup>4</sup>Brimacombe, K. R., Hall, M. D., Auld, D. S., Inglese, J., Austin, C. P., Gottesman, M. M., and Fung, K. L., *Assay Drug Dev. Technol.* **2009**, 7, 233.

described above. Additionally, the multidrug resistant cell line KB-V1 was cultured in 1 µg/mL vinblastine to maintain P-glycoprotein expression.<sup>5</sup>

**NCI-60 cell line screen.** Growth inhibition of 50% (GI<sub>50</sub>) is defined as the concentration of a compound that causes a 50% reduction in cell growth compared to the untreated control. The GI<sub>50</sub> is comparable to an IC<sub>50</sub>, but takes into account the cell count at time zero and in untreated controls at the end of the assay period; the IC<sub>50</sub> is calculated based on the number of cells in the untreated control when the assay endpoint is read. The GI<sub>50</sub> is calculated as  $100 \times (T - T_0)/(C - T_0) = 50$ , where T is the test optical density, T<sub>0</sub> is the optical density at time zero, and C is the control optical density. The total growth inhibition (TGI) signifies a cytostatic effect, and is calculated as  $100 \times (T - T_0)/(C - T_0) = 0$ . The lethal concentration of 50% (LC<sub>50</sub>) signifies a cytotoxic effect, and is calculated as  $100 \times (T - T_0)/T_0 = -50$ . The control optical density is not used in the calculation of LC<sub>50</sub>.<sup>6</sup>

---

<sup>5</sup> Shen, D. W., Cardarelli, C., Hwang, J., Cornwell, M., Richert, N., Ishii, S., Pastan, I., and Gottesman, M. M. *J. Biol. Chem.*, **1986**, 261, 7762.

<sup>6</sup> Monks, A., Scudiero, D., Skehan, P., Showmaker, R., Paull, K., Vistica, D., Hose, C., Langley, J., Cronise, P., Vaigro-Wolff, A., Gray-Goodrich, M., Campbell, H., Mayo, J., Boyd, M., *J. Natl. Cancer Inst.*, **1991**, 83, 757.

**Table S1.** NMR Data for Candidaspongiolide A (**3**) in Acetone-*d*<sub>6</sub> (600 MHz, 500MHz<sup>a</sup>)

| No. | $\delta_C$         | $\delta_H$ , mult ( <i>J</i> , Hz) |
|-----|--------------------|------------------------------------|
| 1   | 172.6 <sup>a</sup> | —                                  |
| 2   | 72.3               | 3.79, d (1.9)                      |
| 3   | 84.7               | 3.83, dd (9.5, 1.9)                |
| 4   | 48.5               | 3.19, dq (9.5, 7.0)                |
| 5   | 214.6 <sup>a</sup> | —                                  |
| 6   | 49.0               | 3.41, dq (10.6, 7.0)               |
| 7   | 80.3               | 5.40, d (10.6)                     |
| 8   | 134.2 <sup>a</sup> | —                                  |
| 9   | 132.5              | 5.46, br d (9.8)                   |
| 10  | 45.7               | 3.43, dq (9.8, 6.8)                |
| 11  | 210.9 <sup>a</sup> | —                                  |
| 12a | 43.8               | 2.72, dd (17.7, 9.7)               |
| 12b |                    | 2.31, dd (17.7, 1.7)               |
| 13  | 69.2               | 4.50, dd (9.7, 1.7)                |
| 14  | 85.2 <sup>a</sup>  | —                                  |
| 15  | 215.9 <sup>a</sup> | —                                  |
| 16  | 48.0               | 4.12, ddd (11.0, 10.8, 4.1)        |
| 17  | 77.9               | 3.22, d (10.8)                     |
| 18  | 63.0 <sup>a</sup>  | —                                  |
| 19  | 66.2               | 2.64, d (9.3)                      |
| 20  | 31.9               | 2.47, ddd (10.7, 9.3, 6.6)         |
| 21  | 131.4              | 5.34 ddq (10.9, 10.7, 1.7)         |
| 22  | 125.3              | 5.49, dq (10.9, 6.8)               |
| 23  | 13.3               | 1.64, dd (6.8, 1.7)                |
| 24  | 14.9 <sup>b</sup>  | 1.21, d (7.0)                      |
| 25  | 14.6               | 1.16, d (7.0)                      |
| 26  | 10.6               | 1.67, br s                         |
| 27  | 15.2               | 0.96, d (6.8)                      |
| 28  | 65.3 <sup>c</sup>  | 3.77, <sup>c</sup> s               |
| 29a | 64.4               | 4.34, dd (10.6, 4.1)               |
| 29b |                    | 3.90, dd (11.0, 10.6)              |
| 30  | 11.3               | 1.35, s                            |
| 31  | 18.6               | 1.08, d (6.6)                      |
| 32  | 60.9               | 3.40, s                            |
| 33  | 170.0 <sup>a</sup> | —                                  |
| 34  | 20.5               | 2.01, s                            |

<sup>a</sup> Quaternary carbons obtained from original candidaspongiolide core NMR data (500 MHz).

<sup>b</sup> Originally misassigned. Careful inspection of original HSQC data for candidaspongiolide A (candidaspongiolide core) showed no correlation between  $\delta_C$  22.9 and  $\delta_H$  1.21.

<sup>c</sup> The multiplicity-edited HSQC used to characterize **3** clearly indicated a CH<sub>2</sub> multiplicity (opposite phase to CH/CH<sub>3</sub>) for the correlation between  $\delta_C$  65.3 and  $\delta_H$  3.77, suggesting it was the C-28 primary alcohol. However, the <sup>1</sup>H/<sup>13</sup>C chemical shifts did not match those in the literature for candidaspongiolide A (candidaspongiolide core). Further evaluation of the original COSY and HMBC spectra for candidaspongiolide A (candidaspongiolide core) indicated that  $\delta_C$  65.3 and  $\delta_H$  3.77 were the correct assignments for C-28, and H-28, respectively, and a minor contaminant was responsible for the correlation observed between  $\delta_C$  70.9 and  $\delta_H$  3.61.<sup>7</sup>

<sup>7</sup> See Supporting information for Meragelman, T. L.; Willis, R. H.; Woldemichael, G. M.; Heaton, A.; Murphy, P. T.; Snader, K. M.; Newman, D. J.; van Soest, R.; Boyd, M. R.; Cardellina II, J. H.; McKee, T. C. *J. Nat. Prod.* **2007**, *70*, 1133.



**Table S2.** NMR Data for Tedanolide (**5**) (600 MHz, CDCl<sub>3</sub>)

| No.   | $\delta_C$ | $\delta_H$ , mult ( <i>J</i> , Hz) |
|-------|------------|------------------------------------|
| 1     | 171.8      | —                                  |
| 2     | 71.7       | 3.86, br dd (8.7, 1.7)             |
| 3     | 83.5       | 3.66, dd (8.6, 1.7)                |
| 4     | 48.8       | 3.02, <sup>a</sup> (8.6, 7.0)      |
| 5     | 215.7      | —                                  |
| 6     | 50.3       | 3.02, <sup>a</sup> (10.2, 6.9)     |
| 7     | 80.1       | 4.10, br dd (10.2, 2.5)            |
| 8     | 136.6      | —                                  |
| 9     | 129.8      | 5.46, <sup>a</sup>                 |
| 10    | 45.7       | 3.40, m (6.8)                      |
| 11    | 213.1      | —                                  |
| 12a   | 45.1       | 2.57, dd (17.0, 9.5)               |
| 12b   |            | 2.47, dd (17.0, 2.9)               |
| 13    | 68.7       | 4.29, m (9.5, 2.9)                 |
| 14    | 53.6       | 3.03, <sup>a</sup> (6.9)           |
| 15    | 214.5      | —                                  |
| 16    | 52.4       | 3.53, ddd (11.6, 9.6, 4.0)         |
| 17    | 77.4       | 3.23, br d (9.6, 3.2)              |
| 18    | 63.2       | —                                  |
| 19    | 67.0       | 2.60, d (9.3)                      |
| 20    | 31.6       | 2.42, ddq (10.6, 9.3, 6.5)         |
| 21    | 130.6      | 5.22, ddq (10.8, 10.6, 1.6)        |
| 22    | 125.5      | 5.45, <sup>a</sup> (10.8, 6.8)     |
| 23    | 13.6       | 1.60, dd (6.8, 1.6)                |
| 24    | 14.5       | 1.21, d (7.0)                      |
| 25    | 15.8       | 1.27, d (6.9)                      |
| 26    | 10.7       | 1.61, s                            |
| 27    | 16.9       | 1.07, d (6.8)                      |
| 28    | 10.9       | 1.10, d (6.9)                      |
| 29a   | 64.3       | 4.25, dd (10.5, 4.0)               |
| 29b   |            | 4.11, dd (11.6, 10.5)              |
| 30    | 11.8       | 1.37, s                            |
| 31    | 18.8       | 1.11, d (6.5)                      |
| 32    | 60.8       | 3.29, s                            |
| 2-OH  |            | 2.75, br d (8.7)                   |
| 7-OH  |            | 1.44, br d (2.5)                   |
| 13-OH |            | 3.32, br d (3.2)                   |
| 17-OH |            | 2.13, br d (3.2)                   |

<sup>a</sup> Signals overlapped.

**Table S3.** NMR Data for Tedanolide (**5**) (600 MHz, CD<sub>3</sub>OD)

| No. | $\delta_C$ | $\delta_H$ , mult ( <i>J</i> , Hz) |
|-----|------------|------------------------------------|
| 1   | 171.5      | —                                  |
| 2   | 72.6       | 3.76, d (1.7)                      |
| 3   | 84.7       | 3.68, dd (9.6, 1.7)                |
| 4   | 51.0       | 3.12, <sup>a</sup> (9.6, 7.1)      |
| 5   | 216.4      | —                                  |
| 6   | 49.6       | 3.11, <sup>a</sup> (10.5, 7.1)     |
| 7   | 80.2       | 4.00, d (10.5)                     |
| 8   | 138.9      | —                                  |
| 9   | 130.1      | 5.35, br d (10.0)                  |
| 10  | 47.0       | 3.41, dq (10.0, 6.9)               |
| 11  | 211.2      | —                                  |
| 12a | 47.5       | 2.60, dd (16.9, 9.6)               |
| 12b |            | 2.34, dd (16.9, 1.7)               |
| 13  | 69.3       | 4.22, ddd (9.6, 7.0, 1.7)          |
| 14  | 55.8       | 2.91, dq (7.0, 7.0)                |
| 15  | 214.1      | —                                  |
| 16  | 54.5       | 3.43, ddd (11.2, 10.5, 3.9)        |
| 17  | 78.0       | 3.13, <sup>a</sup> (10.5)          |
| 18  | 63.9       | —                                  |
| 19  | 67.7       | 2.58, d (9.3)                      |
| 20  | 32.7       | 2.49, ddq (10.4, 9.3, 6.6)         |
| 21  | 132.1      | 5.31, ddq (10.8, 10.4, 1.6)        |
| 22  | 126.4      | 5.48, dq (10.8, 6.9)               |
| 23  | 13.6       | 1.63, dd (6.9, 1.6)                |
| 24  | 15.2       | 1.24, d (7.1)                      |
| 25  | 16.1       | 1.27, d (7.1)                      |
| 26  | 10.6       | 1.65, s                            |
| 27  | 15.9       | 1.05, d (6.9)                      |
| 28  | 12.0       | 1.15, d (7.0)                      |
| 29a | 65.5       | 4.25, dd (10.7, 3.9)               |
| 29b |            | 4.00, dd (11.2, 10.7)              |
| 30  | 11.6       | 1.37, s                            |
| 31  | 18.8       | 1.10, d (6.6)                      |
| 32  | 61.1       | 3.34, s                            |

<sup>a</sup> Signals overlapped.

**Table S4.** NMR Data for 28-acetyl-precandidaspongiolide A (**6**) (600 MHz, CD<sub>3</sub>OD)

| No. | $\delta_C$ | $\delta_H$ , mult ( <i>J</i> , Hz) |
|-----|------------|------------------------------------|
| 1   | 172.5      | —                                  |
| 2   | 72.2       | 3.79, d (2.1)                      |
| 3   | 83.7       | 3.74, dd (9.3, 2.1)                |
| 4   | 49.0       | 3.10, dq (9.3, 7.1)                |
| 5   | 216.5      | —                                  |
| 6   | 50.0       | 3.12, dq (10.1, 7.0)               |
| 7   | 79.5       | 4.00, d (10.1)                     |
| 8   | 137.7      | —                                  |
| 9   | 129.0      | 5.34, br d (9.6)                   |
| 10  | 45.9       | 3.42, dq (9.6, 6.9)                |
| 11  | 212.1      | —                                  |
| 12a | 43.3       | 2.75, dd (17.1, 9.3)               |
| 12b |            | 2.36, dd (17.1, 2.1)               |
| 13  | 68.7       | 4.38, dd (9.3, 2.1)                |
| 14  | 82.0       | —                                  |
| 15  | 212.5      | —                                  |
| 16  | 48.0       | 4.02, <sup>a</sup> (10.3, 3.4)     |
| 17  | 77.4       | 3.09, d (10.3)                     |
| 18  | 63.1       | —                                  |
| 19  | 66.5       | 2.61, d (9.3)                      |
| 20  | 31.6       | 2.49, ddq (10.5, 9.3, 6.6)         |
| 21  | 130.8      | 5.31, ddq (10.8, 10.5, 1.6)        |
| 22  | 125.2      | 5.50, dq (10.8, 6.9)               |
| 23  | 12.7       | 1.64, dd (6.9, 1.6)                |
| 24  | 14.0       | 1.22, d (7.1)                      |
| 25  | 14.9       | 1.25, d (7.0)                      |
| 26  | 9.8        | 1.66, br s                         |
| 27  | 15.4       | 1.06, d (6.9)                      |
| 28a | 64.2       | 4.25, d (11.0)                     |
| 28b |            | 4.20, d (11.0)                     |
| 29a | 63.2       | 4.35, dd (11.2, 3.4)               |
| 29b |            | 4.01, <sup>a</sup> (11.2)          |
| 30  | 10.6       | 1.38, s                            |
| 31  | 18.0       | 1.11, d (6.6)                      |
| 32  | 60.5       | 3.36, s                            |
| 33  | 171.6      | —                                  |
| 34  | 19.9       | 2.01, s                            |

<sup>a</sup> Signals overlapped.

**Table S5.** NMR Data for 11*R*-dihydro precandidaspongiolide A (**7**) (600 MHz, CD<sub>3</sub>OD)

| No. | $\delta_C$ | $\delta_H$ , mult ( <i>J</i> , Hz)  |
|-----|------------|-------------------------------------|
| 1   | 172.2      | —                                   |
| 2   | 71.6       | 3.64, d (2.2)                       |
| 3   | 84.8       | 3.72, <sup>a</sup> dd (10.0, 2.2)   |
| 4   | 47.9       | 3.26, dq (10.0, 6.9)                |
| 5   | 217.0      | —                                   |
| 6   | 51.1       | 3.23, dq (9.7, 7.2)                 |
| 7   | 78.3       | 4.17, d (9.7)                       |
| 8   | 135.8      | —                                   |
| 9   | 130.0      | 5.62, br d (9.0)                    |
| 10  | 38.1       | 2.19, dq (9.0, 7.1, 1.7)            |
| 11  | 76.3       | 3.74, <sup>a</sup> (10.5, 1.7, 1.7) |
| 12a | 36.2       | 1.53, ddd (14.1, 10.5, 10.5)        |
| 12b |            | 1.06, ddd (14.1, 1.7, 1.7)          |
| 13  | 73.2       | 4.28, dd (10.5, 1.7)                |
| 14  | 84.9       | —                                   |
| 15  | 215.6      | —                                   |
| 16  | 47.1       | 4.03, ddd (11.1, 10.9, 4.1)         |
| 17  | 77.3       | 3.29, <sup>b</sup> (10.9)           |
| 18  | 62.8       | —                                   |
| 19  | 66.4       | 2.64, d (9.3)                       |
| 20  | 31.6       | 2.46, ddq (10.5, 9.3, 6.5)          |
| 21  | 130.8      | 5.37, ddq (10.7, 10.5, 1.6)         |
| 22  | 125.2      | 5.54, dq (10.7, 6.9)                |
| 23  | 12.5       | 1.62, dd (6.9, 1.6)                 |
| 24  | 14.8       | 1.20, d (6.9)                       |
| 25  | 13.9       | 1.26, d (7.2)                       |
| 26  | 9.3        | 1.54, s                             |
| 27  | 17.1       | 1.00, d (7.1)                       |
| 28a | 64.8       | 3.81, d (11.6)                      |
| 28b |            | 3.77, d (11.6)                      |
| 29a | 64.7       | 4.26, dd (10.6, 4.1)                |
| 29b |            | 3.88, dd (11.1, 10.6)               |
| 30  | 10.6       | 1.30, s                             |
| 31  | 17.7       | 1.11, d (6.5)                       |
| 32  | 60.4       | 3.43, s                             |

<sup>a</sup> Signals overlapped. <sup>b</sup> Buried under CD<sub>3</sub>OD signal.

**Table S6.** NMR Data for 11*S*-dihydro precandidaspongiolide A (**8**) (600 MHz, CD<sub>3</sub>OD)

| No. | $\delta_C$ | $\delta_H$ , mult ( <i>J</i> , Hz) |
|-----|------------|------------------------------------|
| 1   | 172.2      | —                                  |
| 2   | 71.5       | 3.59, d (1.9)                      |
| 3   | 84.1       | 3.84, <sup>a</sup> (10.0, 1.9)     |
| 4   | 48.1       | 3.25, dq (10.0, 6.9)               |
| 5   | 217.8      | —                                  |
| 6   | 50.8       | 3.18, dq (10.3, 7.0)               |
| 7   | 78.7       | 4.07, d (10.3)                     |
| 8   | 135.0      | —                                  |
| 9   | 133.2      | 5.18, br d (8.9)                   |
| 10  | 39.5       | 2.09, ddq (9.9, 8.9, 6.8)          |
| 11  | 73.3       | 3.40, ddd (11.0, 9.9, 1.5)         |
| 12a | 38.4       | 1.48, ddd (14.1, 10.9, 1.5)        |
| 12b |            | 0.88, ddd (14.1, 11.0, 1.8)        |
| 13  | 69.5       | 4.27, <sup>a</sup> (10.9, 1.8)     |
| 14  | 85.2       | —                                  |
| 15  | 216.7      | —                                  |
| 16  | 47.3       | 4.05, ddd (11.3, 11.1, 4.0)        |
| 17  | 77.2       | 3.29, d (11.1)                     |
| 18  | 62.6       | —                                  |
| 19  | 66.5       | 2.63, d (9.5)                      |
| 20  | 31.5       | 2.46, ddq (10.6, 9.5, 6.6)         |
| 21  | 130.9      | 5.36, ddq (10.8, 10.6, 1.3)        |
| 22  | 125.2      | 5.54, ddq (10.8, 6.8)              |
| 23  | 12.6       | 1.62, dd (6.8, 1.3)                |
| 24  | 14.6       | 1.22, d (6.9)                      |
| 25  | 14.3       | 1.26, d (7.0)                      |
| 26  | 9.5        | 1.55, br s                         |
| 27  | 17.1       | 1.01, d (6.8)                      |
| 28a | 66.5       | 3.85, d (11.7)                     |
| 28b |            | 3.81, d (11.7)                     |
| 29a | 64.9       | 4.27, <sup>a</sup> (4.0)           |
| 29b |            | 3.82, <sup>a</sup> (11.3)          |
| 30  | 10.4       | 1.30, s                            |
| 31  | 17.6       | 1.11, d (6.6)                      |
| 32  | 60.3       | 3.42, s                            |

<sup>a</sup> Signals overlapped.

Figure S1. NCI 60-cell line screen, single dose ( $10^{-5}$  M) of 1/2

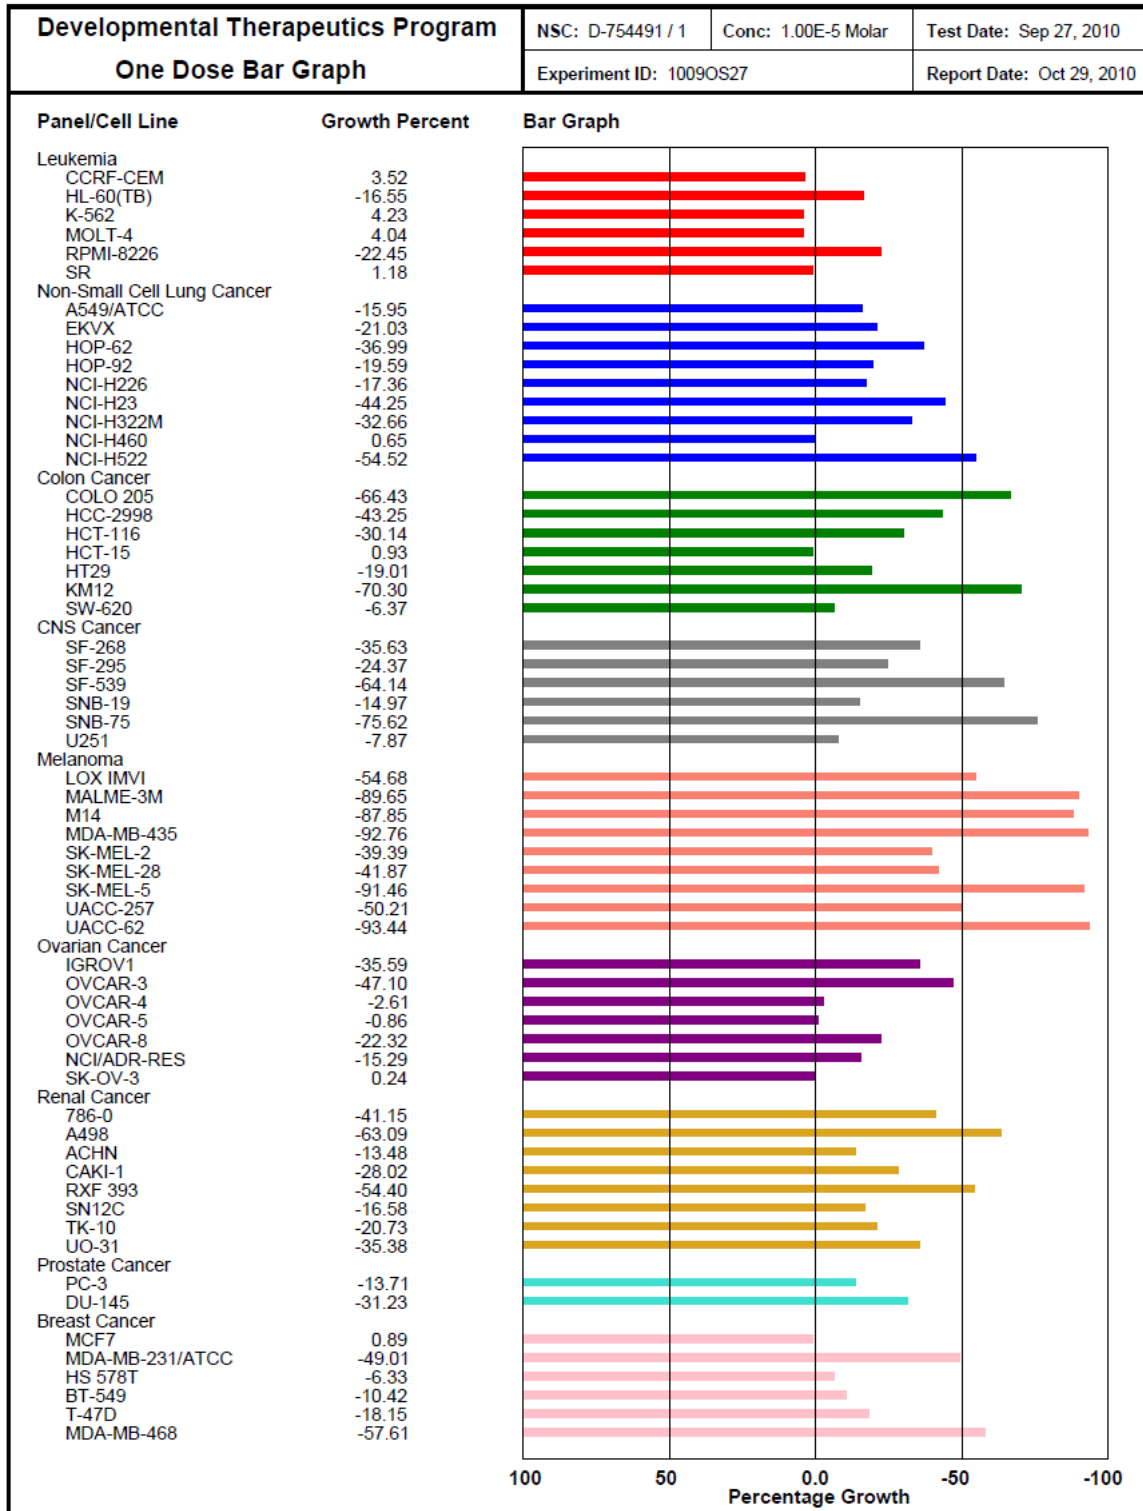

Figure S2. NCI 60-cell line screen, single dose ( $10^{-5}$  M) of 1/2

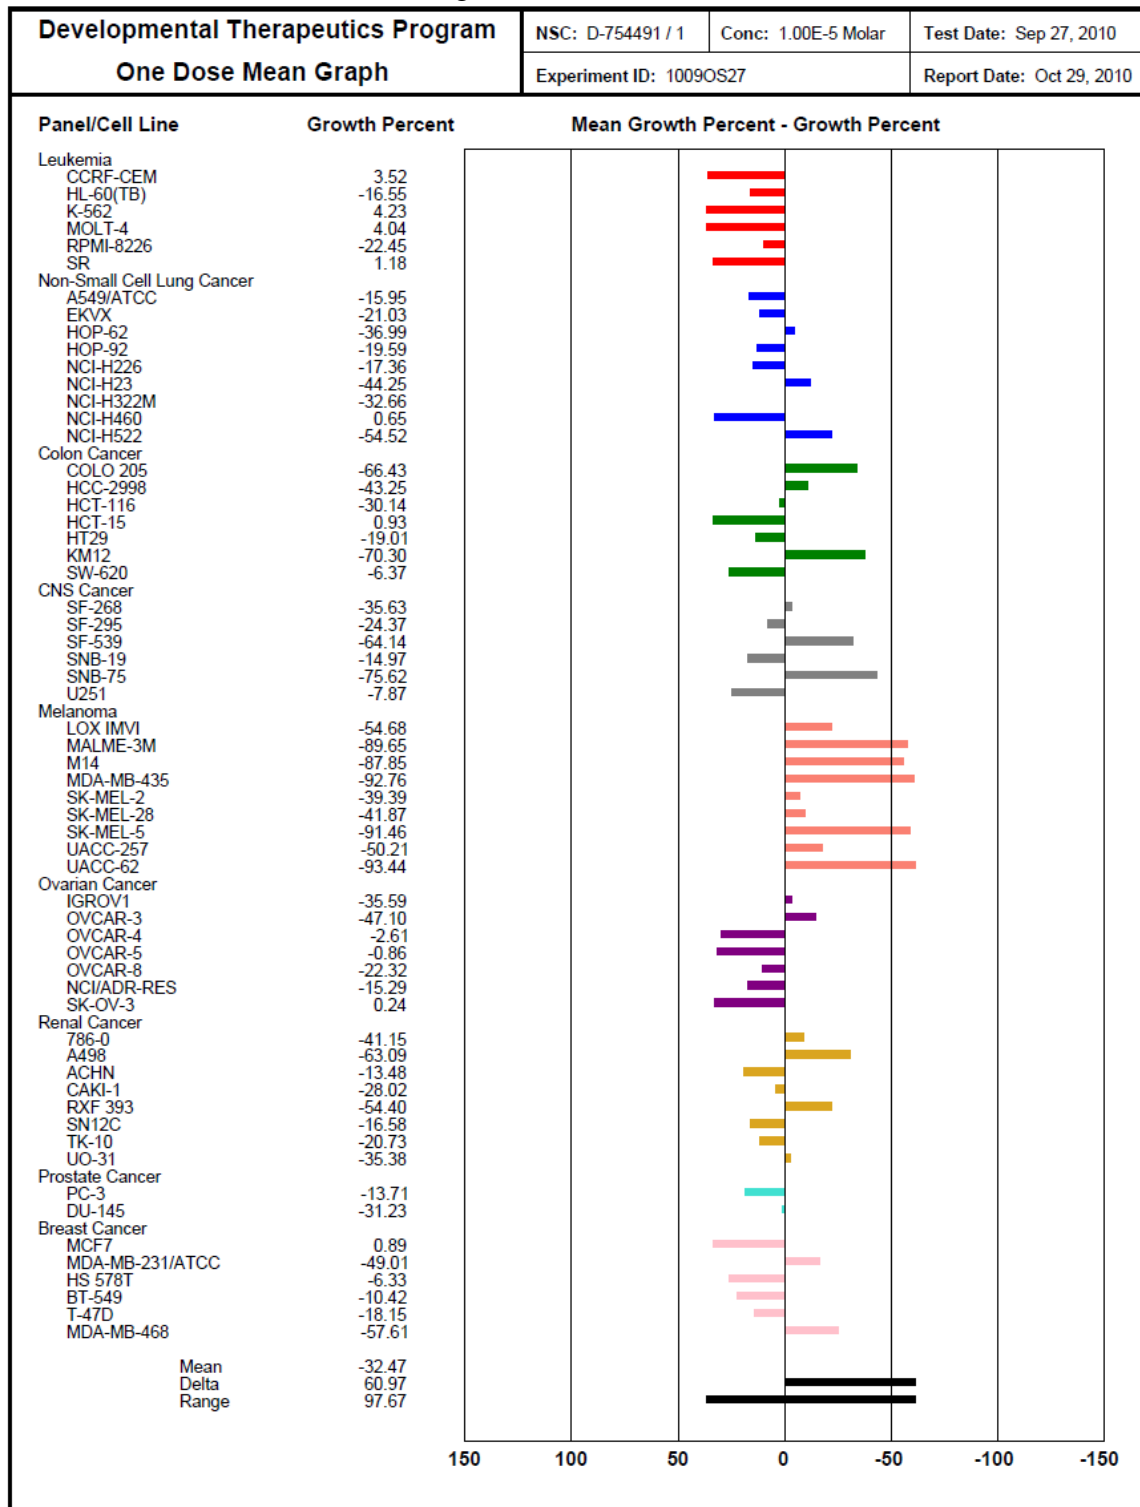

Figure S3. NCI 60-cell line screen, dose response curves for 1/2

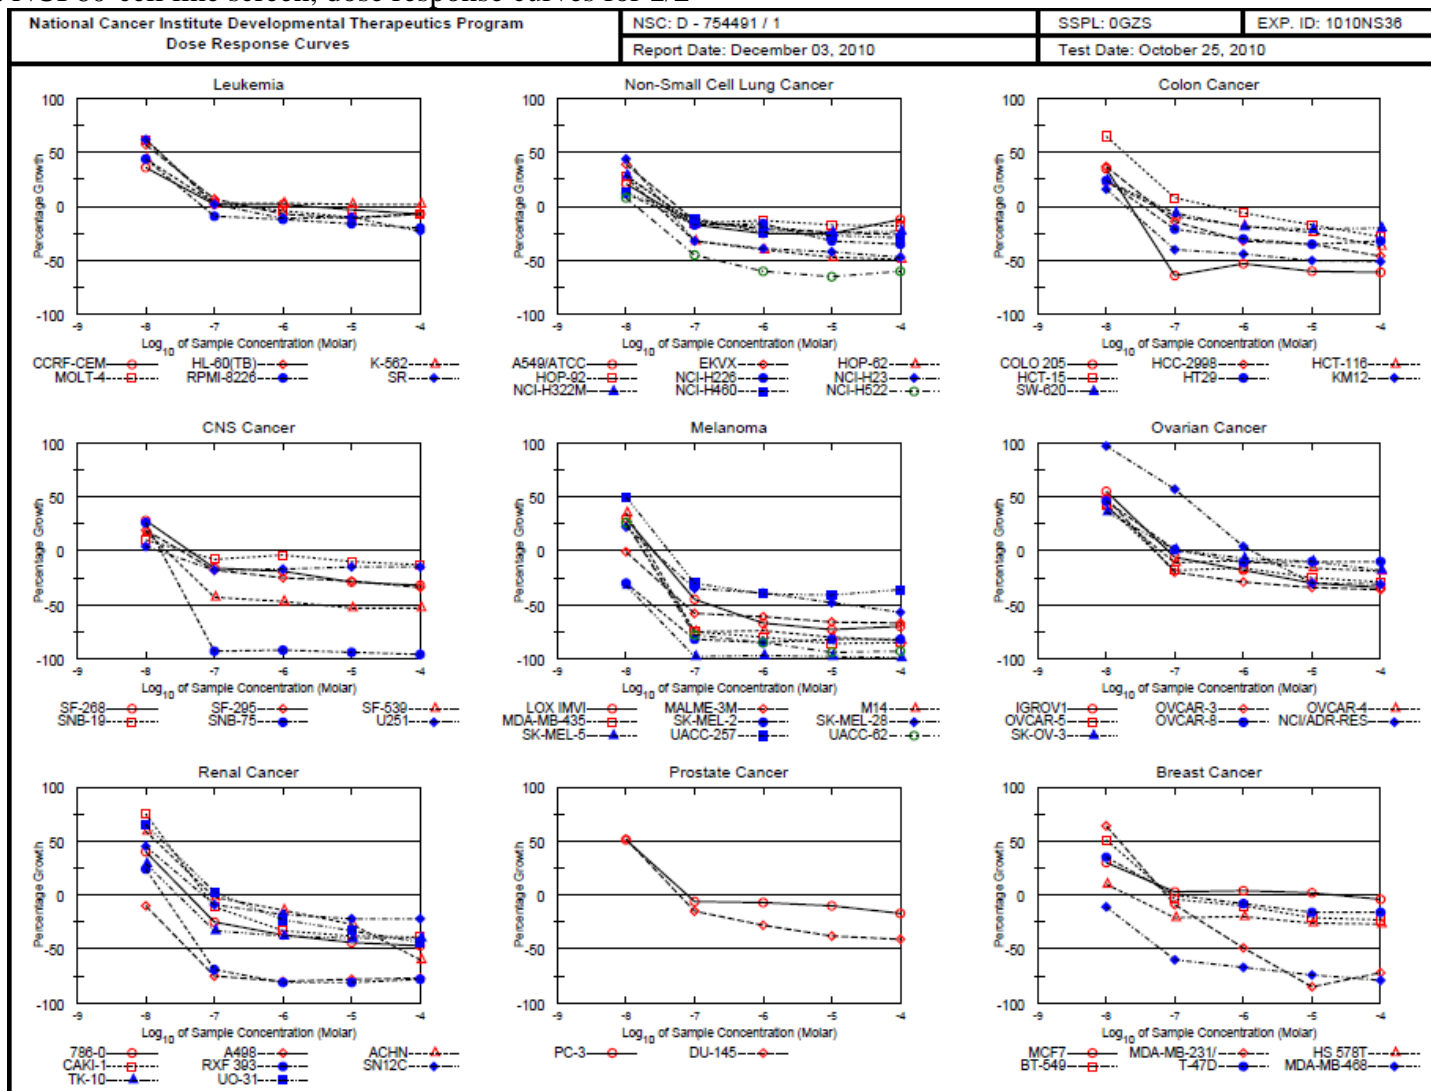



Figure S4. NCI 60-cell line screen, mean bar graphs for 1/2

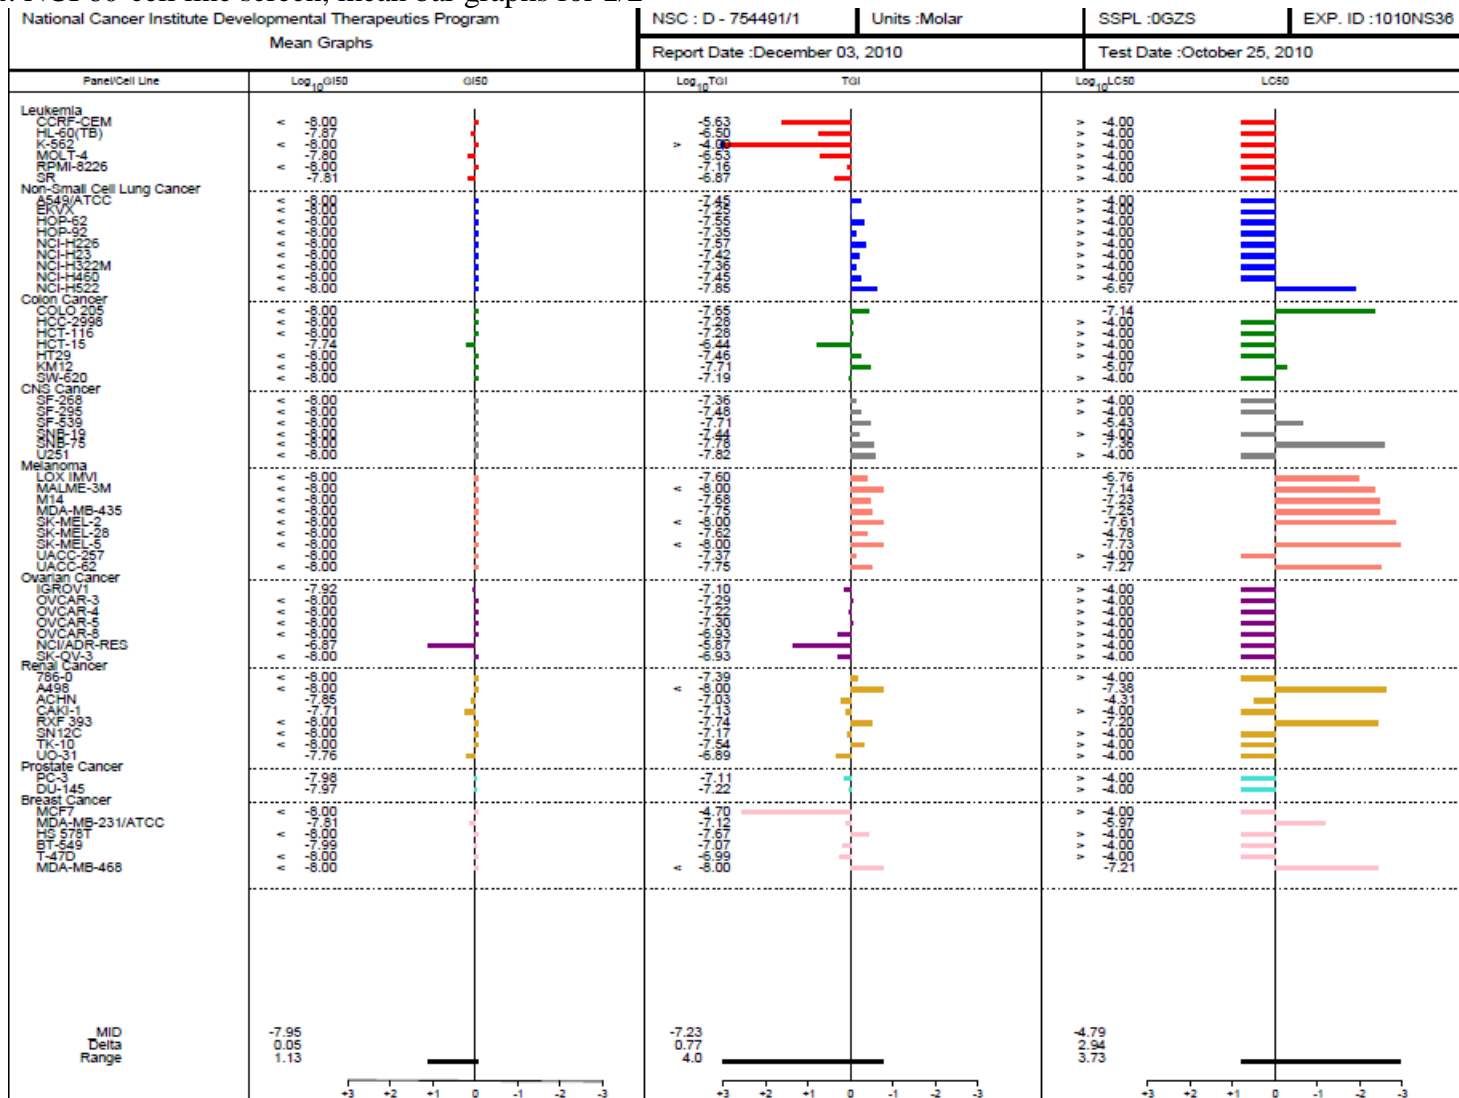

**Figure S5.** NCI 60-cell line screen, dose response curves for candidaspongolide acyl ester mixture

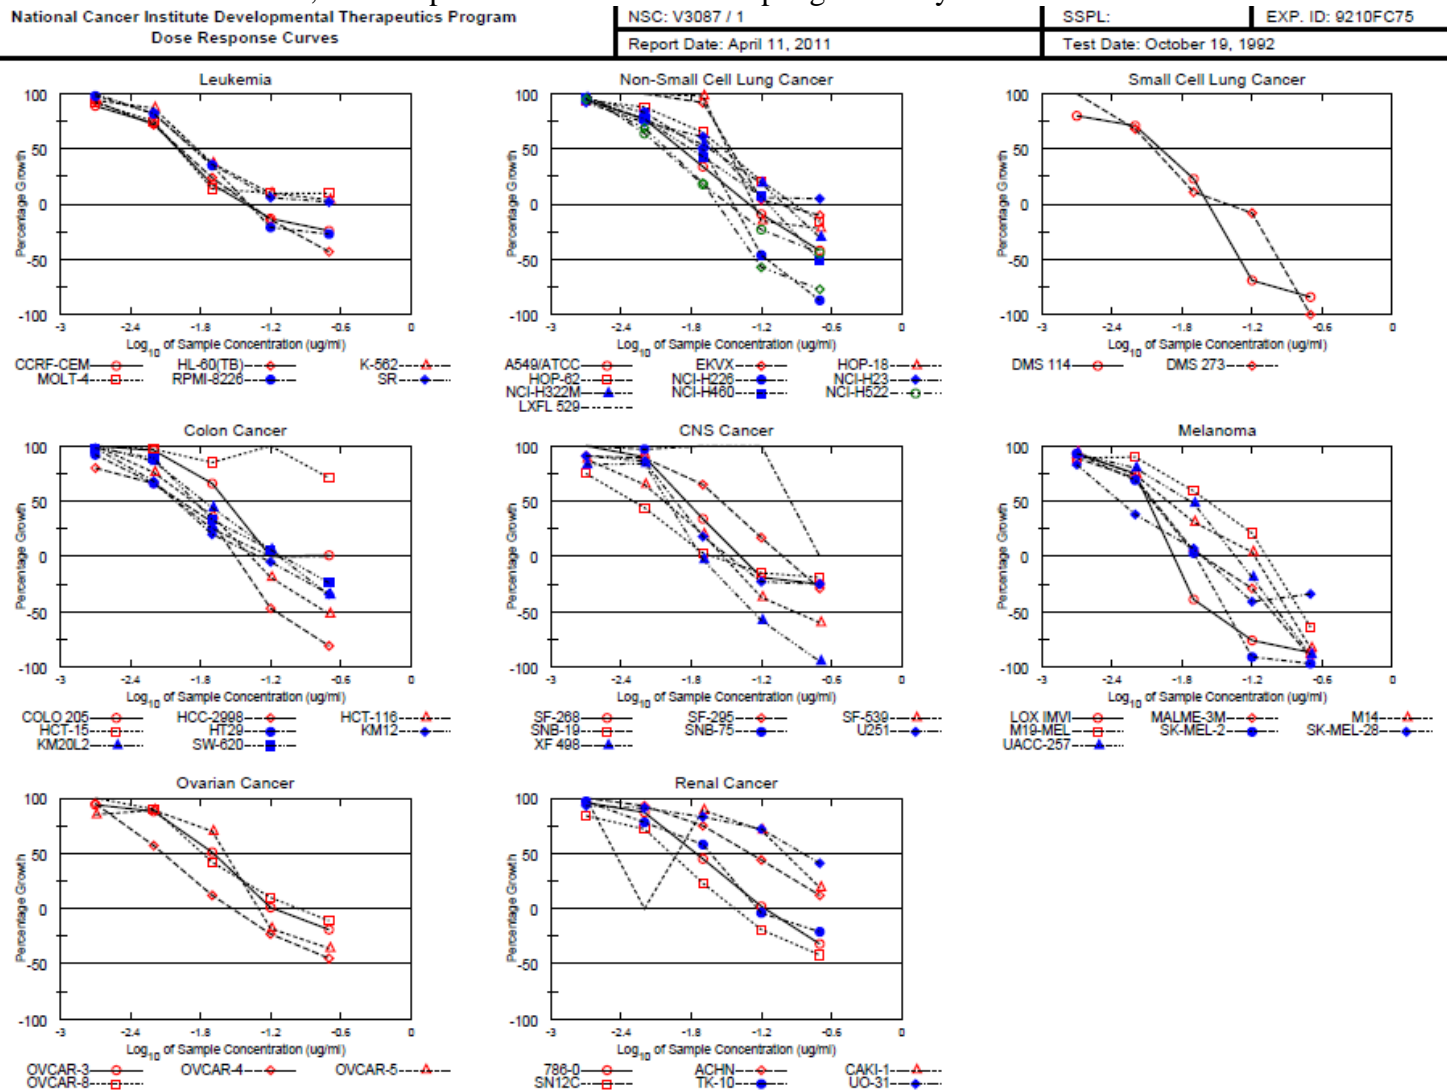

**Figure S6.** NCI 60-cell line screen, mean bar graphs for candidaspongolide acyl ester mixture

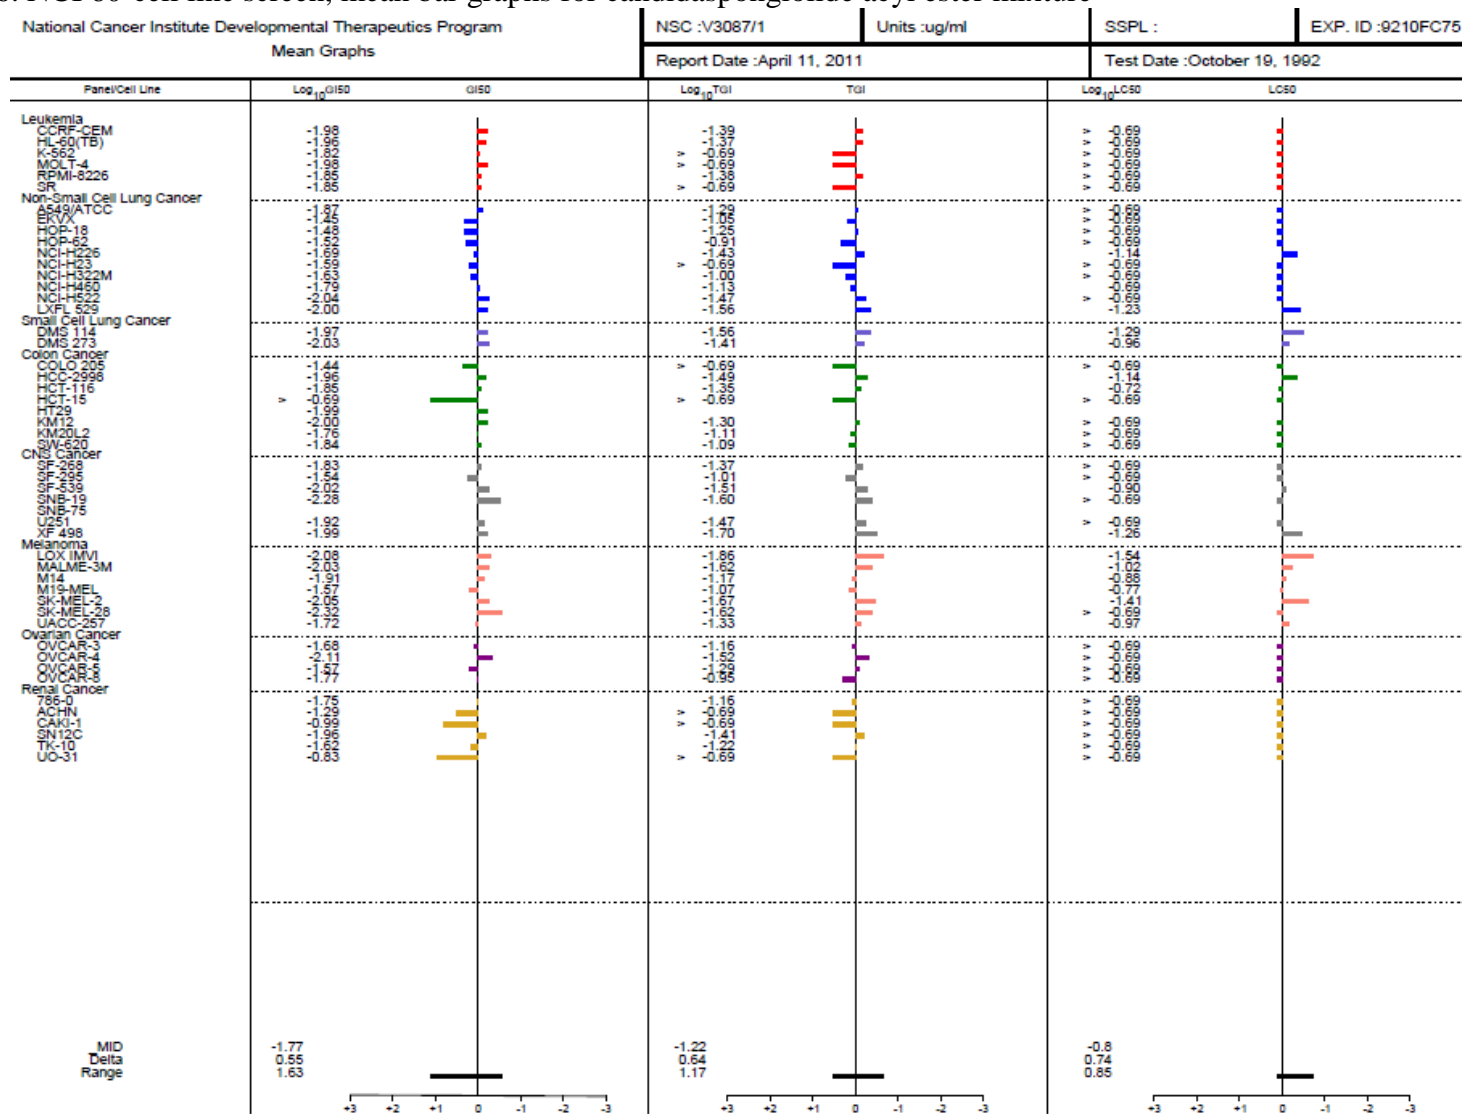

**Figure S7.** NCI 60-cell line screen, dose response curves for candidaspongolide A (macrolide core)

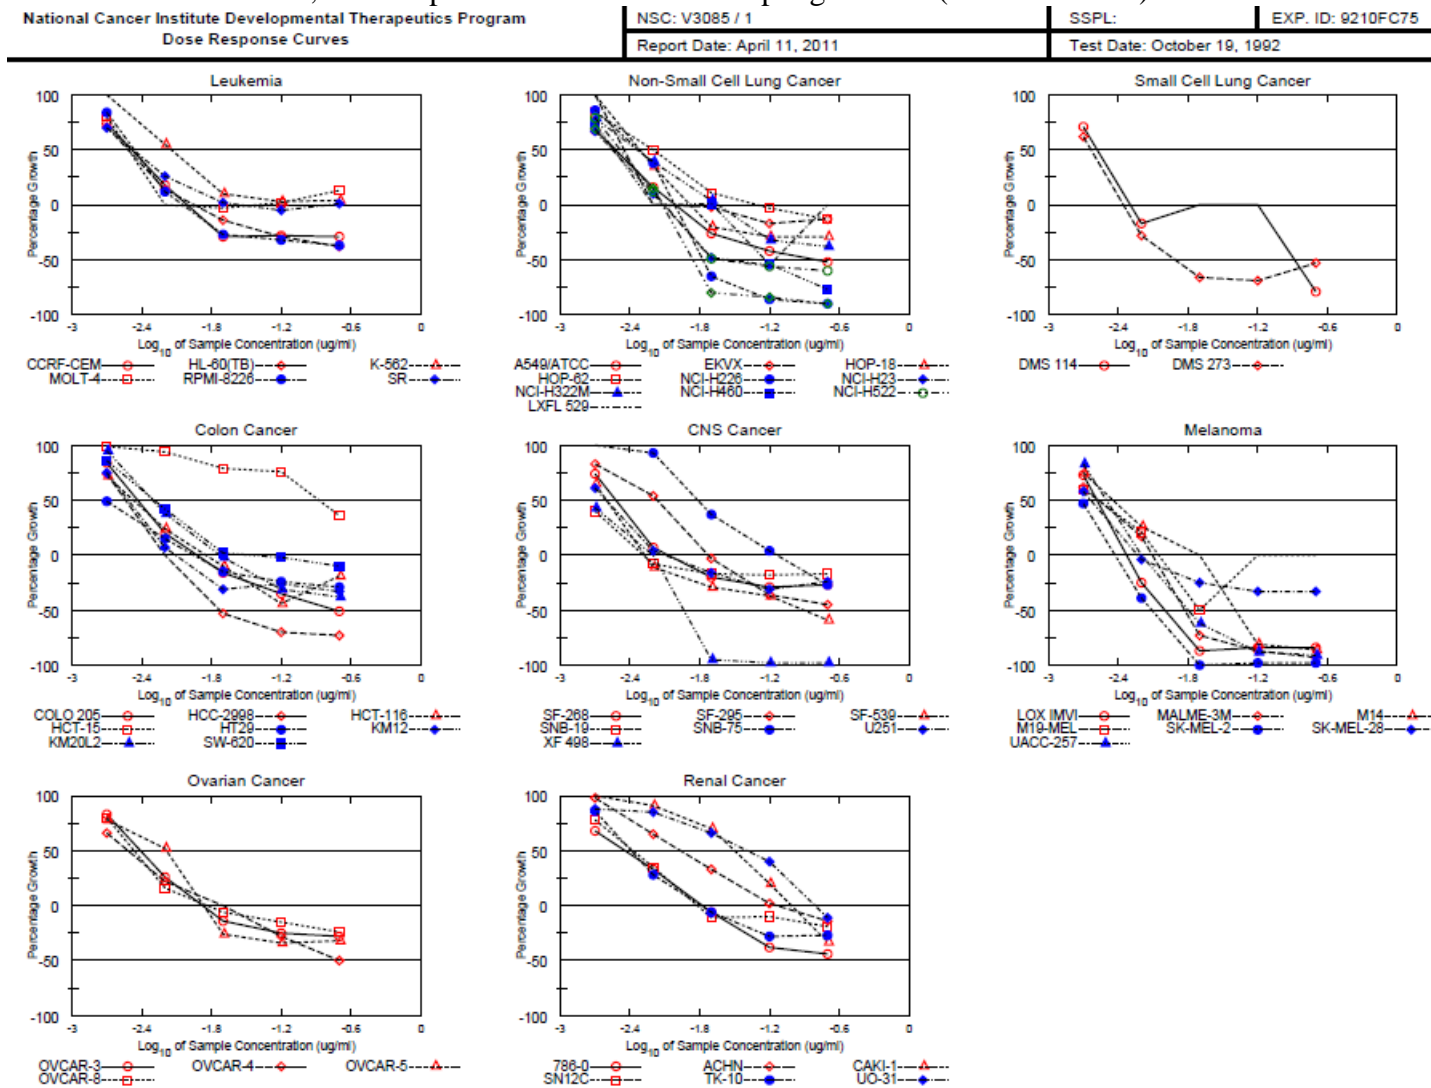

**Figure S8.** NCI 60-cell line screen, mean bar graphs for candidaspongolide A (macrolide core)

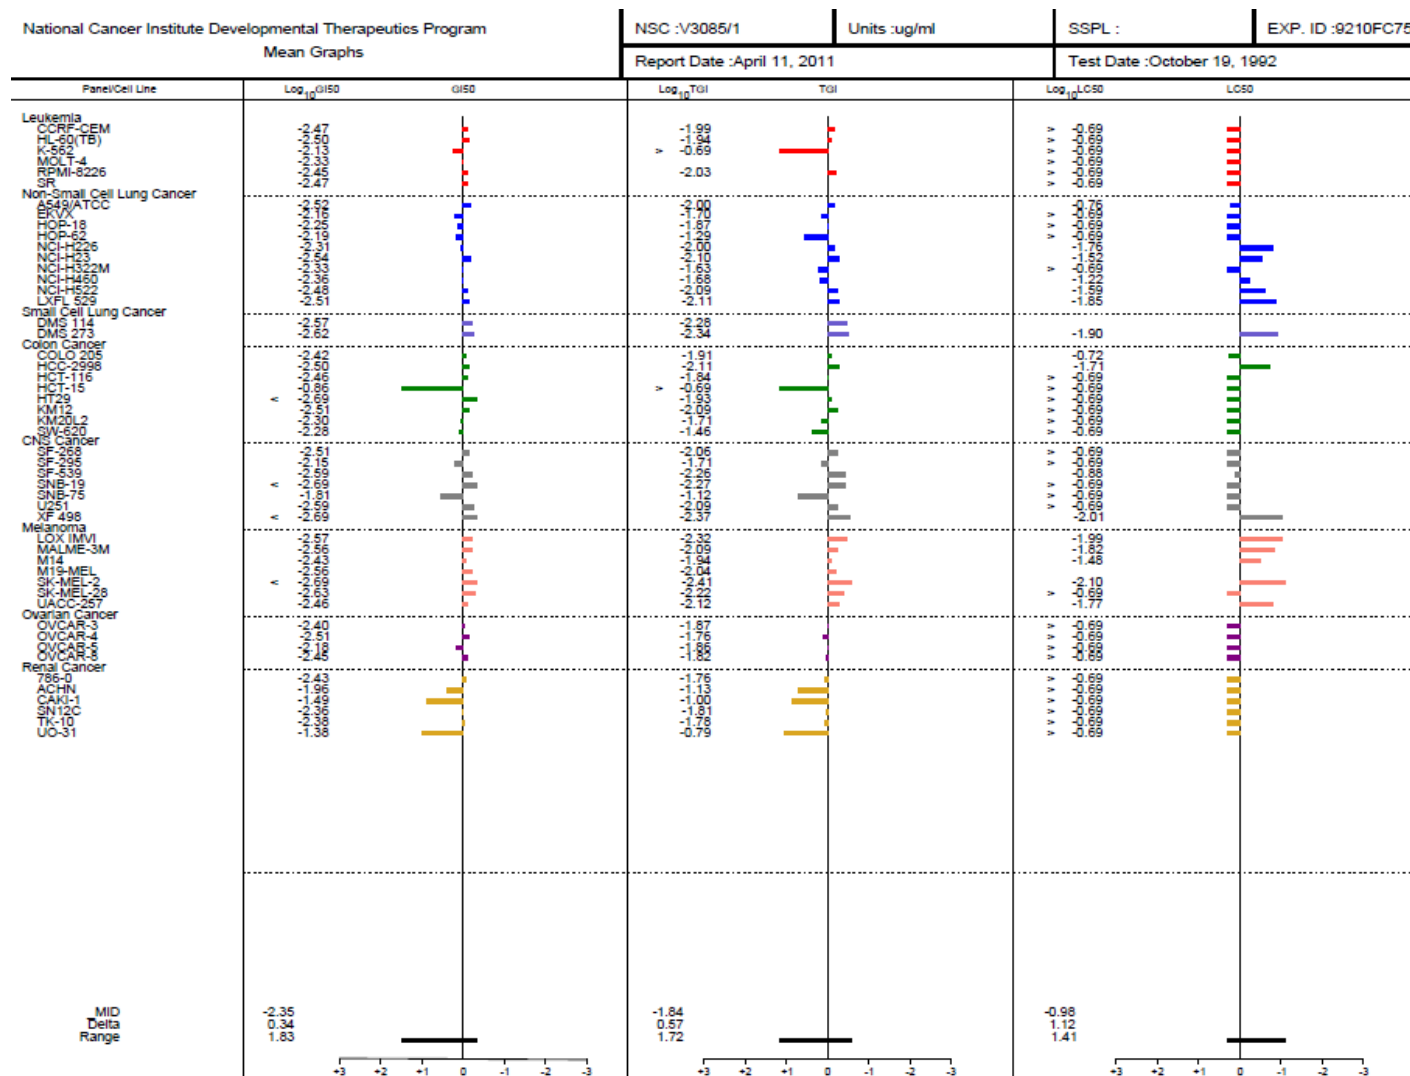

**Table S7.** Melanoma GI<sub>50</sub>'s for candidaspongiodide acyl ester mixture

| Melanoma Cell Line                          | GI <sub>50</sub> (nM) <sup>a</sup> |
|---------------------------------------------|------------------------------------|
| LOX IMVI                                    | 9.0                                |
| MALME-3M                                    | 10.1                               |
| M14                                         | 13.3                               |
| M19-MEL                                     | 29.0                               |
| SK-MEL-2                                    | 9.6                                |
| SK-MEL-28                                   | 5.2                                |
| UACC-257                                    | 20.6                               |
| <b>Melanoma Average</b>                     | <b>13.8</b>                        |
| Mean GI <sub>50</sub> All NCI-60 Cell Lines | 18.3                               |

<sup>a</sup> Based on an estimated average mass of 927.1, calculated utilizing the reported fatty acid compositions (894.5 = 4.4%; 908.5 = 10.6%; 922.6 = 47.3%; 936.6 = 22.7%; 948.6 = 5.2%; 950.6 = 9.8%). Note: 10% of the fatty acid mixture was unidentified and percentages have been re-calculated to total 100%.<sup>8</sup>

**Table S8.** Melanoma GI<sub>50</sub>'s for candidaspongiodide A (macrolide core)

| Melanoma Cell Line                          | GI <sub>50</sub> (nM) |
|---------------------------------------------|-----------------------|
| LOX IMVI                                    | 3.9                   |
| MALME-3M                                    | 4.0                   |
| M14                                         | 5.4                   |
| M19-MEL                                     | 4.0                   |
| SK-MEL-2                                    | < 3.0                 |
| SK-MEL-28                                   | 3.4                   |
| UACC-257                                    | 5.1                   |
| <b>Melanoma Average</b>                     | <b>&lt; 4.1</b>       |
| Mean GI <sub>50</sub> All NCI-60 Cell Lines | 6.5                   |

<sup>8</sup> Meragelman, T. L.; Willis, R. H.; Woldemichael, G. M.; Heaton, A.; Murphy, P. T.; Snader, K. M.; Newman, D. J.; van Soest, R.; Boyd, M. R.; Cardellina II, J. H.; McKee, T. C. *J. Nat. Prod.* **2007**, *70*, 1133.

Figure S9. Melanoma IC<sub>50</sub> curves for 1/2, 3/4, 5-8

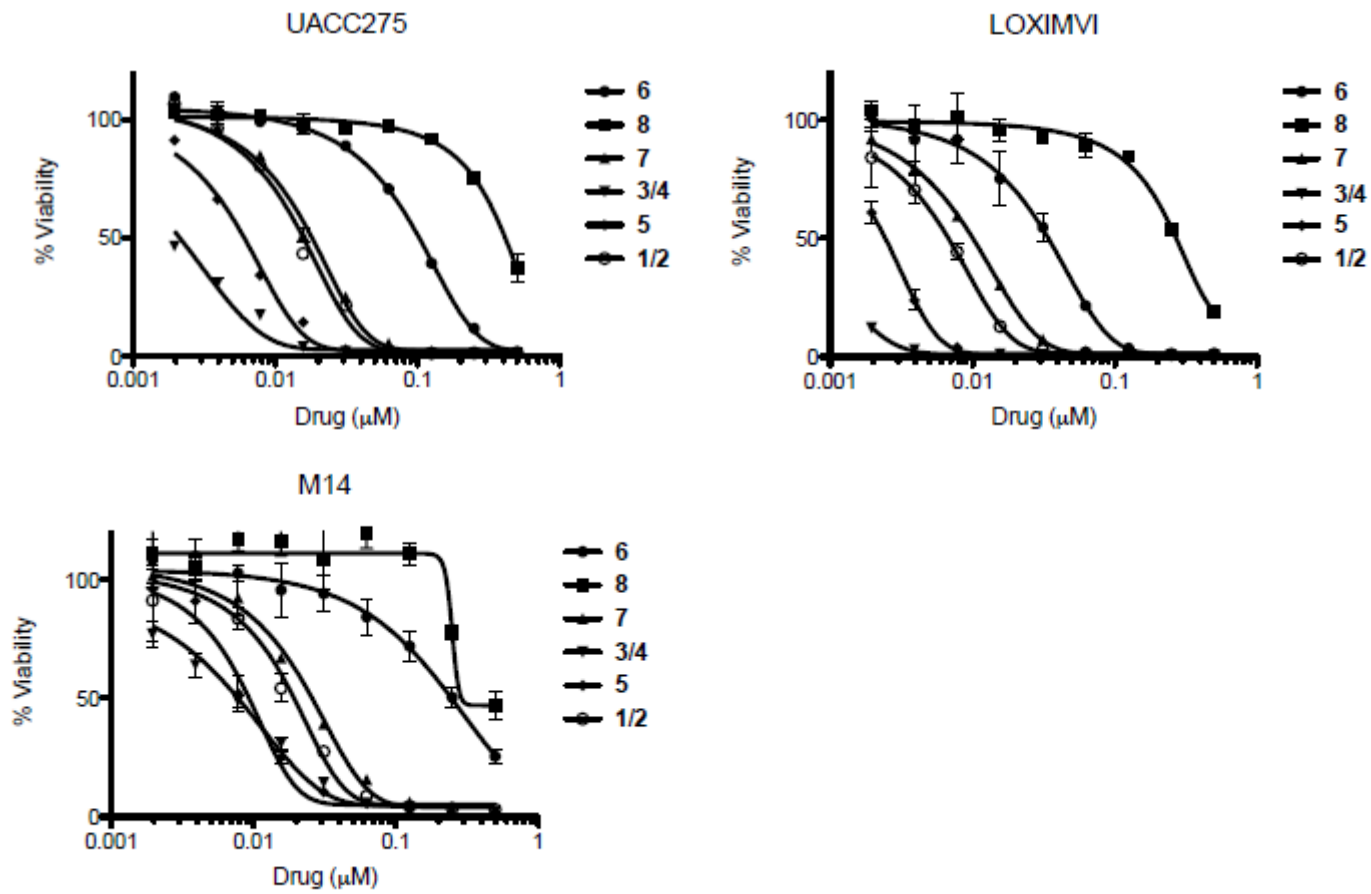

Figure S10. Breast and Lung IC<sub>50</sub> curves for 1/2, 3/4, 5-8

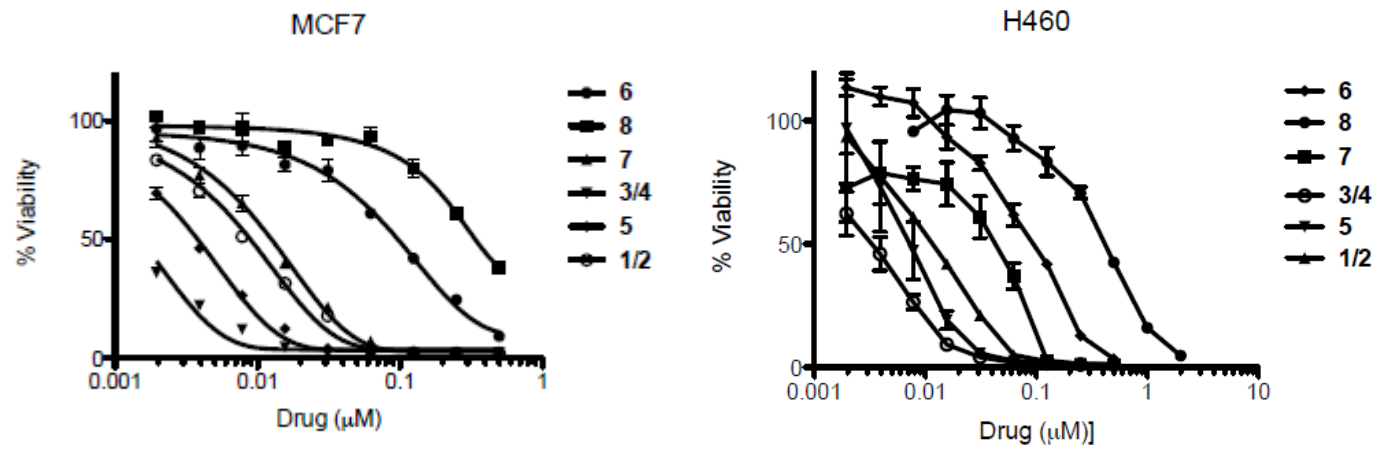



**Figure S11.** Precandidaspongiolides A (1) and B (2) are P-gp substrates

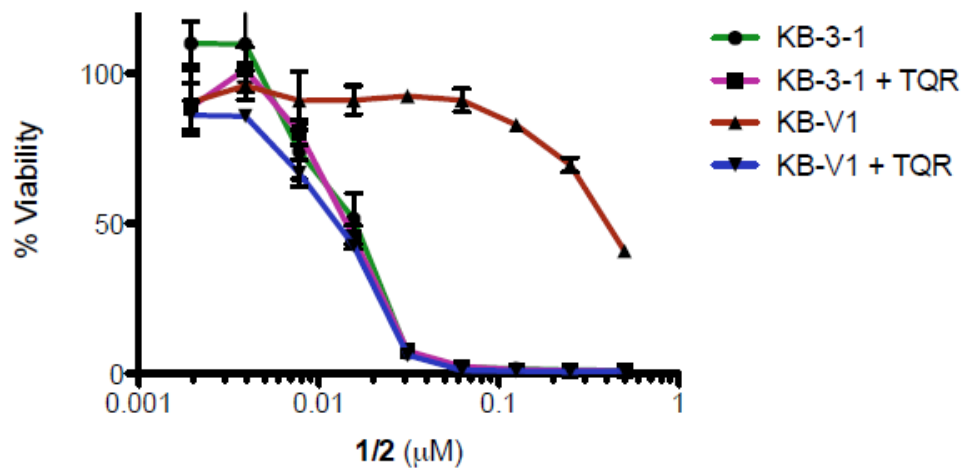

|        | 1/2 (nM)     | 1/2 + TQR (nM) |
|--------|--------------|----------------|
| KB-3-1 | 15.7 ± 4.9   | 14.7 ± 1.5     |
| KB-V1  | 419.3 ± 15.0 | 13.1 ± 0.8     |
| RR     | 26.7         | N/A            |
